# Supplementary material
Source: ML conference proceedings conference paper supplement (https://proceedings.mlr.press/v139/marjani21a.html)
Supplement: Supplementary file 1 [file marjani21a-supp.zip]

Archive with 27 entries (23 files):
- supp/
- supp/code/
- supp/code/BESPOKE.py
- supp/code/Bespoke_Program.py
- supp/code/Experiments.ipynb
- supp/code/KLB_TS.py
- supp/code/PI.py
- supp/code/environment.py
- supp/code/figures/
- supp/code/figures/experimentEASY_01.png
- supp/code/figures/experimentEASY_02.png
- supp/code/figures/experiment_11.png
- supp/code/figures/experiment_Hard_01.png
- supp/code/figures/experiment_Hard_02.png
- supp/code/main.py
- supp/code/pickle/
- supp/code/pickle/MDP_EASY.pkl
- supp/code/pickle/MDP_HARD.pkl
- supp/code/pickle/RIVER_SWIM.pkl
- supp/code/pickle/experiment_EASY.pkl
- supp/code/pickle/experiment_HARD.pkl
- supp/code/plotfigures.py
- supp/code/requirements.txt
- supp/code/sampling.py
- supp/code/stopping.py
- supp/code/README.md
- supp/appendix_included.pdf
