# Supplementary material
Source: ML conference proceedings conference paper supplement (https://proceedings.mlr.press/v139/marjani21a.html)
Supplement: Supplementary file 1 [file marjani21a-supp.zip › supp/code/README.md]

# Implementation of KLB-TS:


## Reproducing experiments:
- The pickle folder contains .pkl files of the two MDPs used in the paper experiments. 
- It also contains the .pkl file of classical example RIVERSWIM (see https://ieeexplore.ieee.org/document/1374179). Note however that RIVERSWIM has a constant $U(\phi) \sim 7\times 10^7$, so it might take some considerable run time.
- The notebook Experiments.ipynb shows how to generate random MDPs of a given size and how to run KLB-TS or BESPOKE on them and plot figures.

## main.py:
You can run the command:   **python main.py -f path_to_mdp_file -o path_to_results_file -n N** to compare KLB-TS and BESPOKE. 
- Change "path_to_mdp_file" to the path of the .pkl file where the mdp object is stored. 
- The results will be stored at "path_to_results_file.pkl". 
- "N" stands for the number of simulations per confidence level, used to compute the expected sample complexity.

Example:  **python main.py -f ./pickle/MDP_EASY -o ./pickle/results_EASY -n 10**


## KLB-TS:
- sampling.py: contains functions to compute the optimal sample allocation and the terms $T_1, \ldots, T_4$ used in the stopping rule.
- stopping.py: checks if the stopping condition is verified
- environment.py: contains functions to generate random MDPs, construct initial estimate of the MDP, sample from the MDP and update MDP estimate after collecting observations.  

## BESPOKE:
- BESPOKE.py: contains the main loop of the algorithm
- BESPOKE_program.py: contains the definition of the convex program solved at each iteration by BESPOKE (see page 32 of supplementary material in https://papers.nips.cc/paper/8800-almost-horizon-free-structure-aware-best-policy-identification-with-a-generative-model)
