# Supplementary material
Source: ML conference proceedings conference paper supplement (https://proceedings.mlr.press/v139/marjani21a.html)
Supplement: Supplementary file 1 [file marjani21a-supp.zip › supp/code/requirements.txt]

numpy==1.16.4
cvxpy==1.0.25
scipy==1.3.0
torch==1.2.0
matplotlib==3.1.0
ipython==7.18.1
