# Supplementary material
Source: ML conference proceedings conference paper supplement (https://proceedings.mlr.press/v139/marjani21a.html)

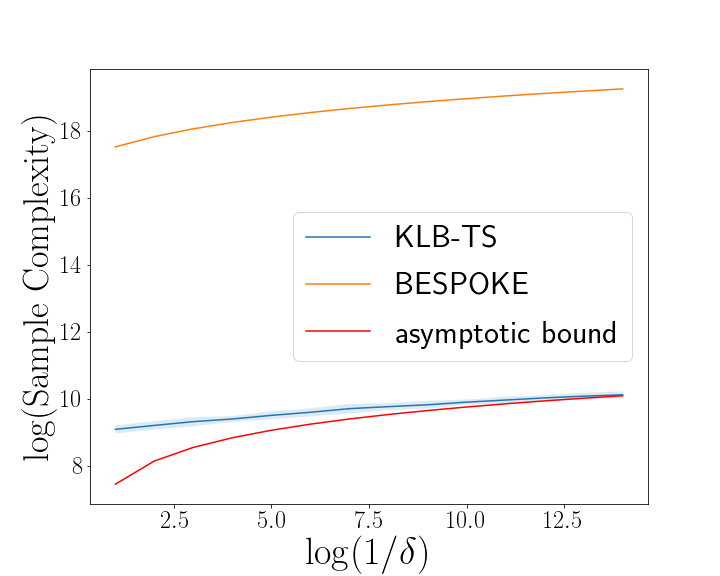

Supplement: Supplementary file 1 [file marjani21a-supp.zip › supp/code/figures/experimentEASY_01.png]

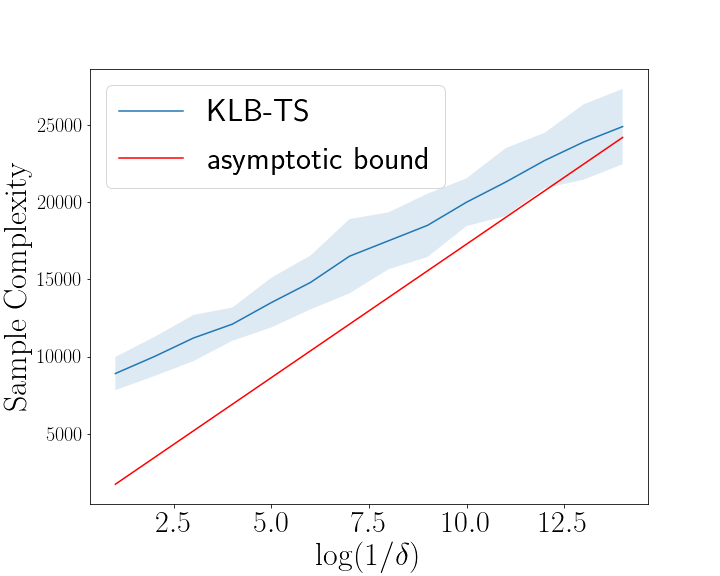

Supplement: Supplementary file 1 [file marjani21a-supp.zip › supp/code/figures/experimentEASY_02.png]

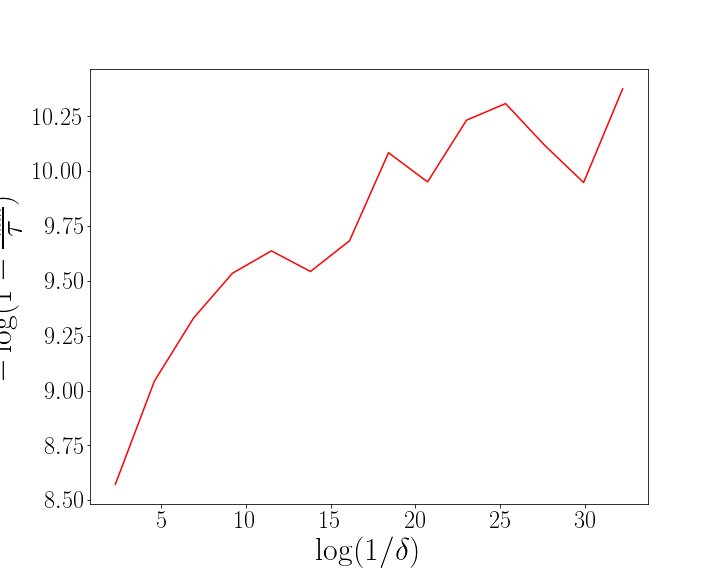

Supplement: Supplementary file 1 [file marjani21a-supp.zip › supp/code/figures/experiment_11.png]

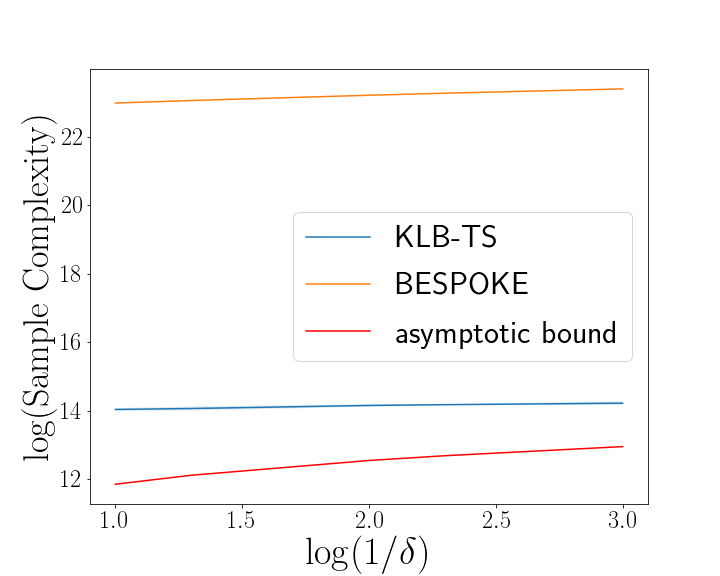

Supplement: Supplementary file 1 [file marjani21a-supp.zip › supp/code/figures/experiment_Hard_01.png]

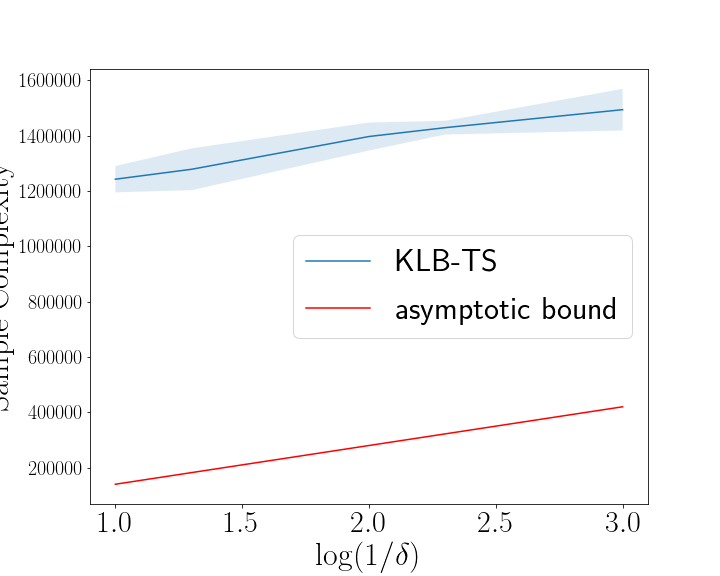

Supplement: Supplementary file 1 [file marjani21a-supp.zip › supp/code/figures/experiment_Hard_02.png]
